# Supplementary material for: A dynamic code for economic object valuation in prefrontal cortex neurons
Source: PubMed Central journal article supplement (PMC5027248; doi:10.1038/ncomms12554), 2016-09-13
Supplement: ncomms12554-s1.pdf [file ncomms12554-s1.pdf]

## Supplementary Information

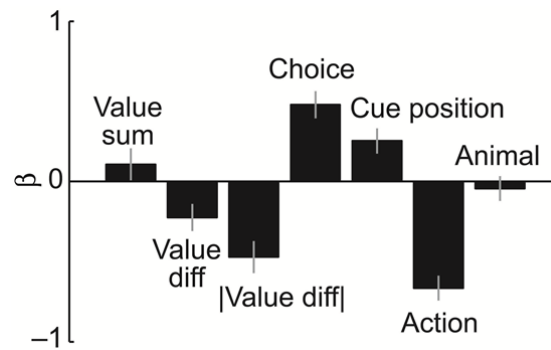

### Supplementary Fig. 1. Influences on saccadic reaction time in choice period.

Multiple regression of z-normalized saccadic reaction time on value sum ( $P = 0.286$ , t-test), signed value difference ( $P = 0.0077$ ), unsigned value difference ( $P = 1.8 \times 10^{-6}$ ), choice ( $P = 1.6 \times 10^{-8}$ ), cue position ( $P = 0.001$ ), action ( $P < 1 \times 10^{-16}$ ), and animal identity ( $P = 0.571$ ; 16,440 trials,  $d.f. = 16,432$ ).

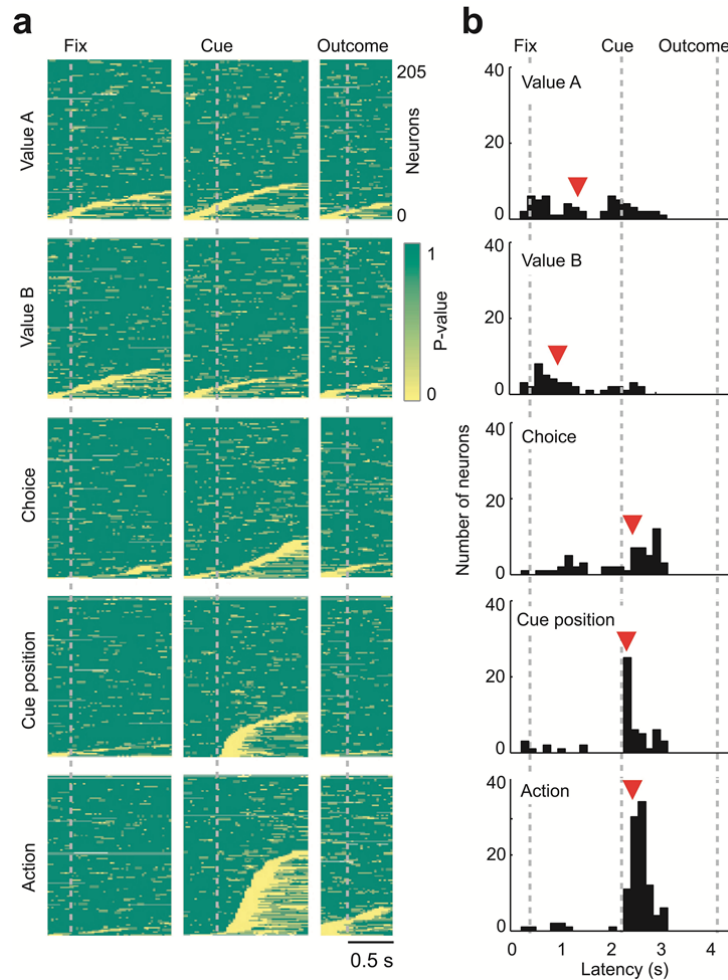

12  
13

14 **Supplementary Fig. 2. Temporal dynamics of value encoding and other task**  
 15 **variables. a.** Statistical *P*-values for value A, value B, choice, cue position and  
 16 action in all neurons, obtained from sliding window multiple regressions aligned to  
 17 fixation, cue and outcome events. Data in each row are from a single neuron. Color  
 18 code indicates *P*-value. Neurons are sorted from bottom to top within each panel  
 19 according to coding latency. For clarity, *P*-values > 0.05 were set to 1. Isolated white  
 20 areas indicate periods in which a neuron was silent. **b.** Latency distributions based  
 21 on analysis in **a**. Compared to value encoding, a lower but significant number of  
 22 neurons encoded the animal's upcoming choices before cue appearance, as early as  
 23 1 s before cues (**a**), although mean onset latency for choice coding followed cue  
 24 appearance (**b**). The number of choice-predictive neurons in the pre-cue phases was  
 25 significantly higher than expected by chance ( $P < 10^{-7}$ , binomial test) and  
 26 significantly higher ( $P < 0.05$ , z-test for dependent samples) than any neurons  
 27 showing false positive pre-cue effects for actions or cue position (both < 5%). Thus,  
 28 the presence of choice-predictive responses at early trial stages provided evidence  
 29 for an object-based decision process that took place before the animal knew where  
 30 to direct its gaze to express the object choice. Consistent with previous studies<sup>1,2</sup>, a  
 31 large number of DLPFC neurons encoded spatial cue position and the animal's  
 32 action in task periods following cue appearance (**a,b**).

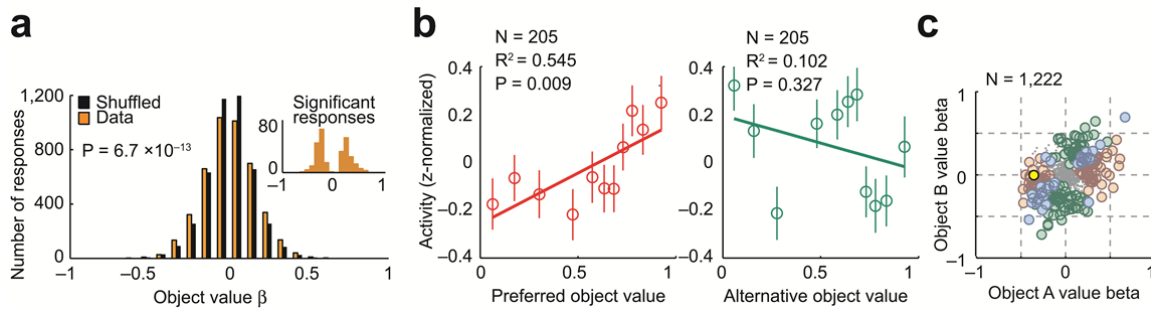

33  
 34  
 35  
 36  
 37  
 38  
 39  
 40  
 41  
 42  
 43  
 44  
 45  
 46  
 47  
 48  
 49  
 50  
 51  
 52  
 53  
 54  
 55  
 56  
 57  
 58  
 59

**Supplementary Fig. 3. Population characteristics of value coding.** **a.** Distribution of regression coefficients for object value based on actual data (orange) and trial-shuffled data (black) of fixed window analysis. The distribution based on actual data was significantly different from shuffled data ( $P = 6.7 \times 10^{-13}$ , Kolmogorov-Smirnov test) and shifted towards larger positive and negative values. Inset shows distribution of significant responses. **b.** Object-specificity of value coding. Linear regression of population activity (205 neurons) on object value for preferred and alternative object. For each neuron with a significant value effect (of either object A or B), we selected the task periods with the highest value correlation for each object and then plotted the activity from each period against object value. The preferred object value in the plot corresponds to the object with the highest value correlation; the alternative object value corresponds to the other object value for which also plotted data from the period with the highest value correlation for that object. Thus, the choice of best interval for object value coding was done independently for the two objects so that the plot is not biased in favor of either object. Data points indicate means of 11 equally populated value bins  $\pm$  s.e.m. **c.** Standardized regression coefficients for all task-related responses (red, significant object A value; green, significant object B value; blue: both value coefficients significant; grey: neither value coefficient significant). Yellow data point: example neuron from Fig. 2. Data in all plots are taken across all task periods.

60

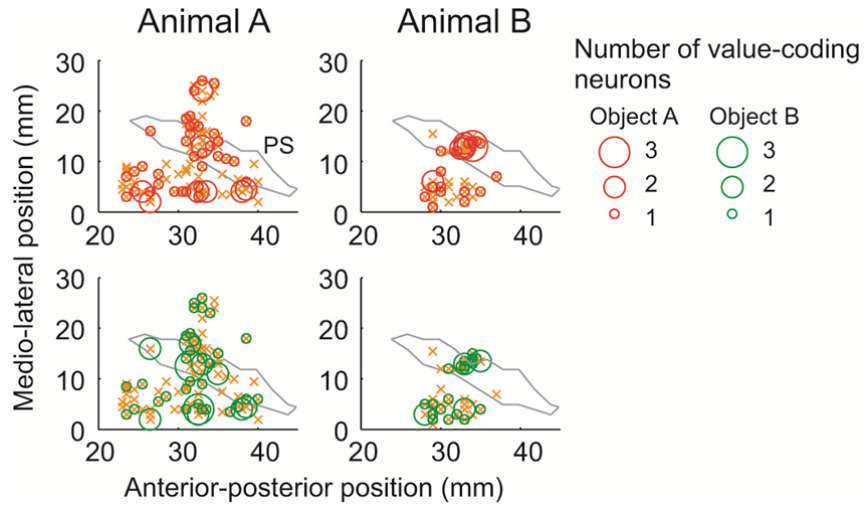

61

62

63

64

65

66

**Supplementary Fig. 4. Anatomical location of recording sites.** Anterior-posterior position was defined with respect to inter-aural line. Orange crosses indicate locations for all recorded neurons. PS, approximate position of principal sulcus.

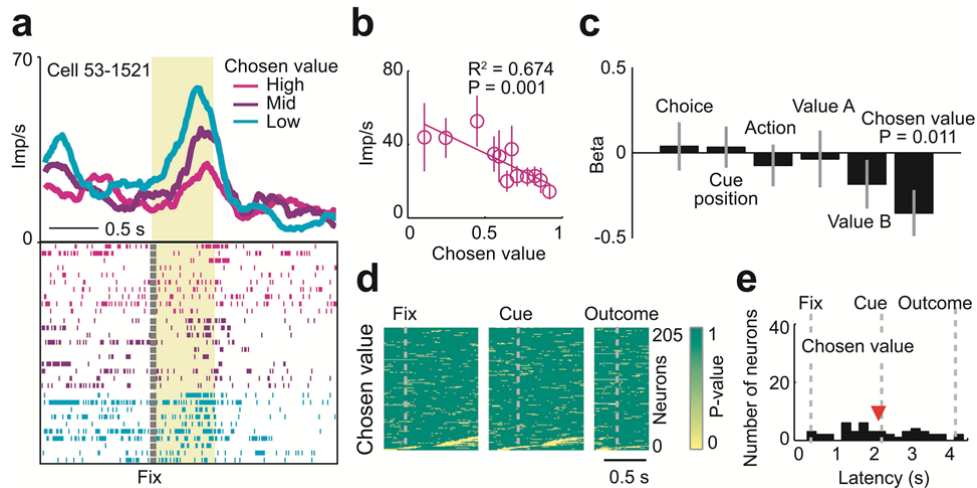

67  
68

69 **Supplementary Fig. 5. Neuronal coding of chosen value.** Rather than coding  
70 object value, a neuronal response might reflect ‘chosen value’, that is, the value of  
71 the chosen object irrespective of its identity. Chosen value coding in different brain  
72 structures has been observed for objects<sup>3,4</sup> and actions<sup>5</sup> and is usually interpreted as  
73 a post-decision signal suitable for reward evaluation and learning but not as input for  
74 choice. Although most value responses in the present experiment did not reflect  
75 choice, we tested specifically for chosen value using additional regressions with  
76 chosen value as covariate alongside object value. **a.** A single DLPFC neuron  
77 encoding chosen value. Peri-event time histogram of impulse rates, aligned to cue  
78 onset, sorted into terciles of chosen value. Raster display: ticks indicate impulses,  
79 rows indicate trials; grey dots indicate event markers for fixation spot onset. Fixation  
80 activity reflected the value of the chosen object. Yellow shaded period was used for  
81 analysis. **b.** Linear regression of fixation-period impulse rate on chosen value  
82 (means of 13 equally populated value bins  $\pm$  s.e.m, *d.f.* = 11). **c.** Coefficients  
83 obtained from fitting a multiple linear regression model to fixation-period impulse  
84 rate. Only chosen value explained a significant proportion of variance in impulse rate  
85 ( $P = 0.011$ , *t*-test,  $N = 68$  trials, *d.f.* = 60). **d.** Statistical *P*-values for chosen value  
86 across all neurons, obtained from sliding window multiple regression. **e.** Latency  
87 distribution based on data in **d.** Red arrowhead indicates median. A moderate  
88 number of task-related responses were directly related to chosen value (91/1222,  
89 7.4%). Their temporal dynamics resembled those of choice-coding responses: they  
90 occurred in some cases before cue appearance but typically not as early as object  
91 value signals (**d,e**). Critically, including the chosen value covariate in the regression  
92 model had little effect on the number of object value responses (265 responses,  
93 compared to 273 in our main model). Thus, object value and chosen value explained  
94 distinct portions of variance in DLPFC neuronal responses.

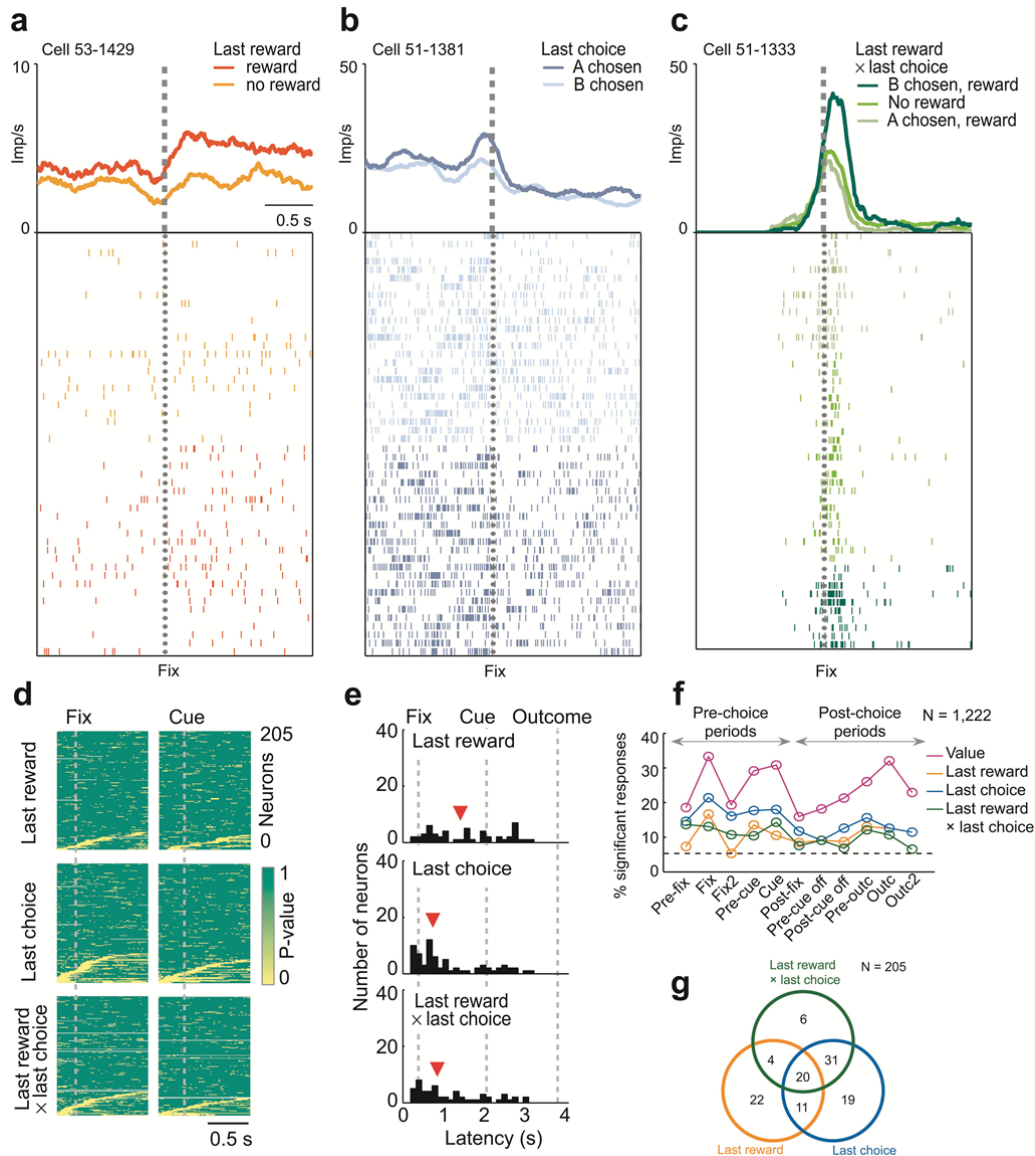

95

96

97

**Supplementary Fig. 6. Coding of reward and choice history in DLPFC neurons.**

98

**a.** A single DLPFC neuron whose fixation activity reflected last-trial reward history.

99

This effect was not explained by current-trial variables which were included as

100

covariates in the multiple regression. **b.** A single DLPFC neuron whose pre-fixation

101

activity reflected last trial choice history. **c.** A single DLPFC neuron whose fixation

102

activity reflected last trial reward x choice interaction; activity was strongest if object

103

B was chosen and rewarded on the last trial. **d.** Statistical P-values for last-trial

104

parameters across all neurons obtained from sliding multiple regression. **e.** Latency

105

distributions based on analysis in **d.** **f.** Percentages of task-related responses with

106

significant value and history coefficients in different trial periods. **g.** Summary of

107

neurons with significant coding of reward history, choice history, reward x choice

108

history and their conjunctions, obtained from sliding window regression.

109

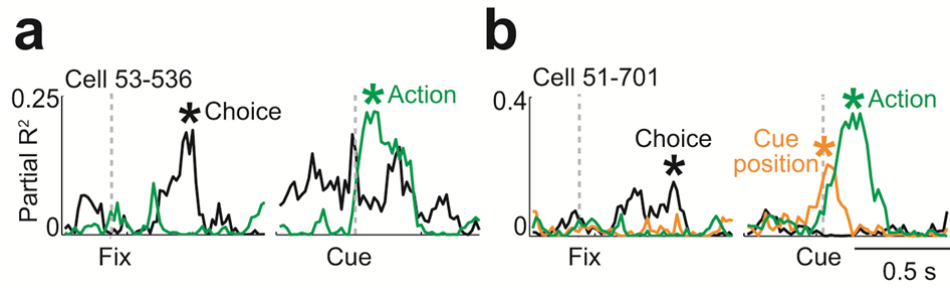

110  
 111  
 112  
 113  
 114  
 115  
 116  
 117

**Supplementary Fig. 7. Choice-to-action coding transitions in two DLPFC neurons.** **a.** A single DLPFC neurons showing choice-to-action transition, similar to DLPFC neurons recently reported in an economic choice task<sup>4</sup>. Coefficients of partial determination (partial  $R^2$ ) from a sliding window multiple regression analysis. **b.** A single DLPFC neurons showing a transition from choice to cue position and action.

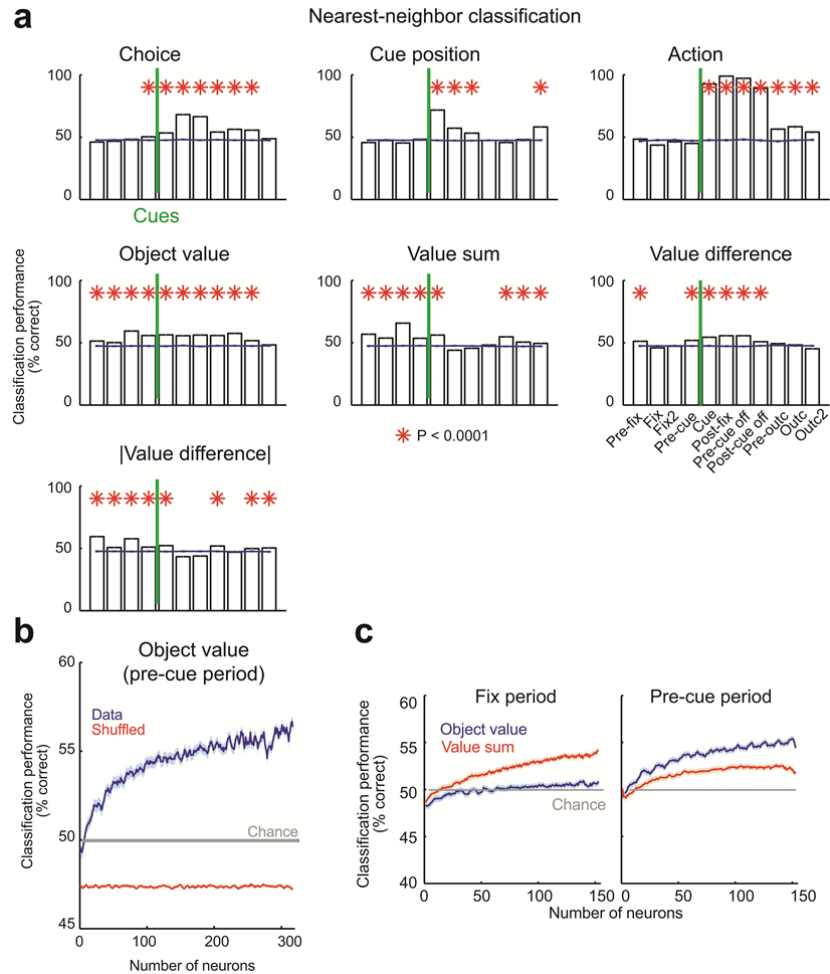

118  
 119  
 120  
 121  
 122  
 123  
 124  
 125  
 126  
 127  
 128  
 129  
 130  
 131  
 132  
 133

**Supplementary Fig. 8. Population decoding with nearest-neighbor classifier. a.** Performance of a nearest neighbor classifier in decoding task variables in different task periods. Performance was measured as cross-validated classification accuracy (% correct, mean  $\pm$  s.e.m.) based on single-trial data from all DLPFC neurons that met inclusion criteria for decoding ( $N = 166$ ). Normalized impulse rates from independently recorded neurons were aggregated into pseudo-populations. The grey line in each plot indicates mean ( $\pm$  s.e.m) decoding performance from trial-shuffled data. Red asterisks indicate that decoding accuracy significantly exceeded shuffled decoding (rank-sum test). **b.** Nearest-neighbor decoding performance as a function of neuron number for object value in pre-cue period. **c.** Nearest-neighbor decoding performance as a function of neuron number for object value and value sum in fixation period (left) and pre-cue period (right).



134 **Supplementary Table 1. Numbers of neurons (and percentages) showing**  
 135 **specific effects with fixed window analysis.**  
 136

|                         | <b>Animal A</b> | <b>Animal B</b> | <b>Both</b> |
|-------------------------|-----------------|-----------------|-------------|
| Total                   | 140             | 65              | 205         |
| Value <sup>1</sup>      | 76 (54%)        | 43 (66%)        | 119 (58%)   |
| Value A <sup>2</sup>    | 51 (67%)        | 30 (70%)        | 81 (40%)    |
| Value B <sup>2</sup>    | 53 (70%)        | 28 (65%)        | 81 (40%)    |
| Achosen <sup>1</sup>    | 58 (41%)        | 25 (38%)        | 83 (41%)    |
| ALeft <sup>1</sup>      | 52 (37%)        | 23 (35%)        | 75 (37%)    |
| Left/right <sup>1</sup> | 83 (59%)        | 35 (54%)        | 118 (58%)   |

137

138 <sup>1</sup> Percentages calculated with respect to neurons in row 'Total' of the same column

139 <sup>2</sup> Percentages calculated with respect to neurons in row 'Value' of the same column

140

141

142 **Supplementary Table 2. Numbers of neurons (and percentages) showing**  
143 **specific effects with sliding window analysis.**

144

|                         | <b>Animal A</b> | <b>Animal B</b> | <b>Both</b> |
|-------------------------|-----------------|-----------------|-------------|
| Total                   | 140             | 65              | 205         |
| Value <sup>1</sup>      | 70 (50%)        | 41 (63%)        | 111 (54%)   |
| Value A <sup>2</sup>    | 49 (70%)        | 30 (73%)        | 79 (39%)    |
| Value B <sup>2</sup>    | 42 (60%)        | 22 (54%)        | 64 (31%)    |
| Achosen <sup>1</sup>    | 47 (34%)        | 27 (42%)        | 74 (36%)    |
| Aleft <sup>1</sup>      | 46 (33%)        | 25 (38%)        | 71 (35%)    |
| Left/right <sup>1</sup> | 84 (60%)        | 35 (54%)        | 119 (58%)   |

145

146 <sup>1</sup> Percentages calculated with respect to neurons in row 'Total' of the same column

147 <sup>2</sup> Percentages calculated with respect to neurons in row 'Value' of the same column

148

149

150

151

152 **Supplementary Table 3. Numbers of neuronal responses (and percentages)**  
 153 **showing specific effects with fixed window analysis.**  
 154

| Variable                 | Effect                  | Animal A  | Animal B  | Both                   |
|--------------------------|-------------------------|-----------|-----------|------------------------|
| Total                    | Task-related            | 847       | 375       | 1222                   |
| Value A <sup>1</sup>     |                         | 85 (10%)  | 51 (14%)  | 136 (11%)              |
|                          | -other <sup>2,3</sup>   | 39 (46%)  | 24 (47%)  | 63 (46%)               |
|                          | +other <sup>3,4</sup>   | 46 (54%)  | 27 (53%)  | 73 (54%)               |
|                          | +Value B <sup>4,5</sup> | 21 (46%)  | 13 (48%)  | 34 (47%)               |
|                          | +Achosen                | 14 (30%)  | 10 (37%)  | 24 (33%)               |
|                          | +Aleft                  | 11 (23%)  | 4 (15%)   | 15 (21%)               |
|                          | +Left/Right             | 16 (35%)  | 11 (41%)  | 27 (37%)               |
| Value B <sup>1</sup>     |                         | 93 (11%)  | 44 (12%)  | 137 (11%) <sup>1</sup> |
|                          | -other <sup>2,3</sup>   | 47 (51%)  | 20 (45%)  | 67 (49%)               |
|                          | +other <sup>3,4</sup>   | 46 (49%)  | 24 (55%)  | 70 (51%)               |
|                          | +Value A <sup>5</sup>   | 21 (46%)  | 13 (54%)  | 34 (49%)               |
|                          | +Achosen                | 11 (24%)  | 4 (17%)   | 15 (21%)               |
|                          | +Aleft                  | 10 (22%)  | 4 (17%)   | 20 (29%)               |
|                          | +Left/Right             | 19 (41%)  | 10 (42%)  | 32 (46%)               |
| Value A & B <sup>1</sup> |                         | 21 (2%)   | 13 (4%)   | 34 (3%) <sup>1</sup>   |
|                          | Value Sum <sup>3</sup>  | 11 (52%)  | 8 (62%)   | 19 (56%)               |
|                          | Value Diff <sup>3</sup> | 10 (48%)  | 5 (38%)   | 15 (44%)               |
| Non-value <sup>1</sup>   |                         | 690 (81%) | 293 (78%) | 983 (80%) <sup>1</sup> |
|                          | Achosen <sup>3</sup>    | 84 (12%)  | 35 (12%)  | 119 (12%)              |
|                          | Aleft <sup>3</sup>      | 54 (8%)   | 27 (9%)   | 81 (8%)                |
|                          | Left/Right <sup>3</sup> | 138 (20%) | 66 (23%)  | 204 (21%)              |

155 <sup>1</sup> Percentages calculated with respect to responses in row 'Total' of the same column

156 <sup>2</sup> Value coding without coding of additional variables

157 <sup>3</sup> Percentages calculated with respect to responses in row 'Total' row of the same  
 158 column

159 <sup>4</sup> Value coding jointly with coding of additional variables

160 <sup>5</sup> Percentages calculated with respect to responses in row '-other' of the same  
 161 column

162

163

164

165 **Supplementary Table 4. Numbers of neurons (and percentages) showing**  
 166 **specific effects with stepwise regression.**  
 167

|                         | <b>Animal A</b> | <b>Animal B</b> | <b>Both</b> |
|-------------------------|-----------------|-----------------|-------------|
| Total                   | 140             | 65              | 205         |
| Value <sup>1</sup>      | 99 (71%)        | 49 (75%)        | 148 (73%)   |
| Value A <sup>2</sup>    | 63 (45%)        | 27 (42%)        | 90 (44%)    |
| Value B <sup>2</sup>    | 47 (34%)        | 26 (40%)        | 73 (36%)    |
| Chosen                  | 44 (31%)        | 25 (38%)        | 69 (34%)    |
| Achosen <sup>1</sup>    | 63 (45%)        | 25 (38%)        | 88 (43%)    |
| ALeft <sup>1</sup>      | 53 (38%)        | 21 (32%)        | 74 (36%)    |
| Left/right <sup>1</sup> | 87 (62%)        | 39 (60%)        | 126 (61%)   |

168  
 169 <sup>1</sup> Percentages calculated with respect to neurons in row 'Total' of the same column  
 170 <sup>2</sup> Percentages calculated with respect to neurons in row 'Value' of the same column  
 171

172 **Supplementary Table 5. Numbers of neurons (and percentages) showing**  
 173 **specific effects with sliding window analysis (extended model).**  
 174

|                                           | <b>Animal A</b> | <b>Animal B</b> | <b>Both</b> |
|-------------------------------------------|-----------------|-----------------|-------------|
| Total                                     | 140             | 65              | 205         |
| Value <sup>1</sup>                        | 80 (57%)        | 39 (60%)        | 119 (58%)   |
| Value A <sup>2</sup>                      | 54 (39%)        | 28 (43%)        | 82 (40%)    |
| Value B <sup>2</sup>                      | 55 (39%)        | 26 (40%)        | 81 (40%)    |
| Last reward <sup>1</sup>                  | 35 (25%)        | 22 (34%)        | 57 (28%)    |
| Last choice <sup>1</sup>                  | 49 (35%)        | 32 (49%)        | 81 (40%)    |
| Last reward x<br>last choice <sup>1</sup> | 39 (28%)        | 22 (34%)        | 61 (30%)    |
| Achosen <sup>1</sup>                      | 49 (35%)        | 25 (39%)        | 74 (36%)    |
| ALeft <sup>1</sup>                        | 45 (32%)        | 22 (34%)        | 67 (33%)    |
| Left/right <sup>1</sup>                   | 82 (68%)        | 31 (48%)        | 113 (55%)   |

175

176 <sup>1</sup> Percentages calculated with respect to neurons in row 'Total' of the same column

177 <sup>2</sup> Percentages calculated with respect to neurons in row 'Value' of the same column

178

179

180

181

182  
183  
184  
185  
186  
187  
188  
189  
190  
191  
192  
193  
194  
195  
196  
197

## References

1. Funahashi, S. Space representation in the prefrontal cortex. *Progress in neurobiology* **103**, 131-155 (2013).
2. Hoshi, E. & Tanji, J. Area-selective neuronal activity in the dorsolateral prefrontal cortex for information retrieval and action planning. *Journal of neurophysiology* **91**, 2707-2722 (2004).
3. Padoa-Schioppa, C. & Assad, J.A. Neurons in the orbitofrontal cortex encode economic value. *Nature* **441**, 223-226 (2006).
4. Cai, X. & Padoa-Schioppa, C. Contributions of orbitofrontal and lateral prefrontal cortices to economic choice and the good-to-action transformation. *Neuron* **81**, 1140-1151 (2014).
5. Lau, B. & Glimcher, P.W. Value representations in the primate striatum during matching behavior. *Neuron* **58**, 451-463 (2008).
